# Supplementary material for: Tuning corneal epithelial cell adhesive strength with varying crosslinker content in silicone hydrogel materials
Source: PubMed Central journal article supplement — Transl Vis Sci Technol. 2020 May 11;9(6):3. doi: 10.1167/tvst.9.6.3 (PMC7408810; doi:10.1167/tvst.9.6.3), 2020-05-11
Supplement: tvst-9-6-3_s001.pdf [file tvst-9-6-3_s001.pdf]

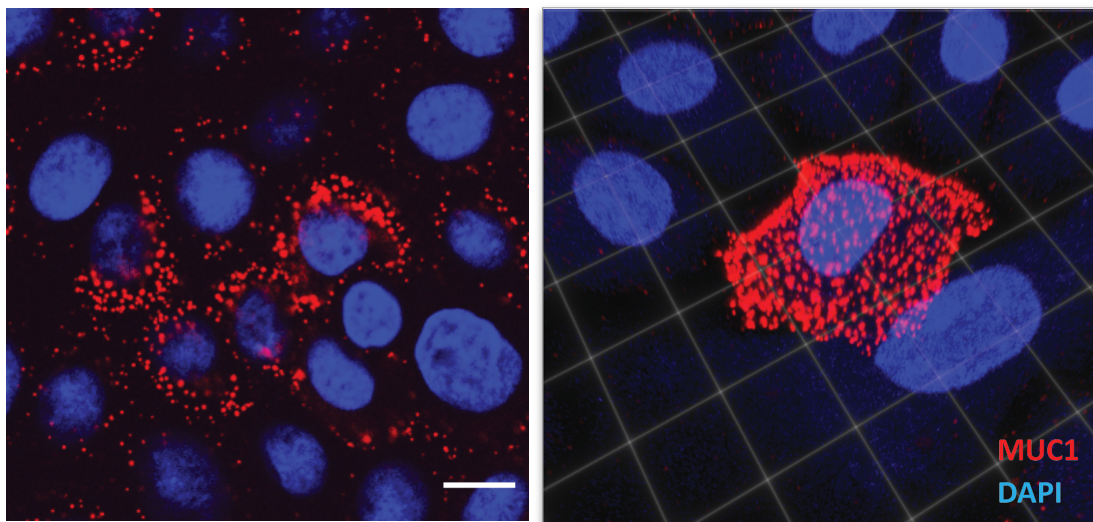

Figure S1. A spinning disk confocal image showing the presence of MUC1 on hTCEpi cell monolayer surface. Scale bar: 10  $\mu\text{m}$ .

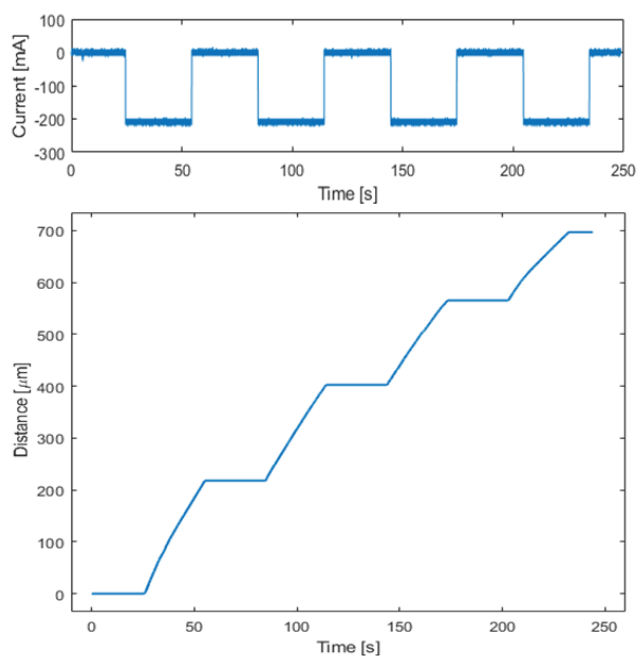

Figure S2. Raw data from LCMR calibration experiments. Top: step currents; bottom: the particle tracking result from video recorded through microscope.

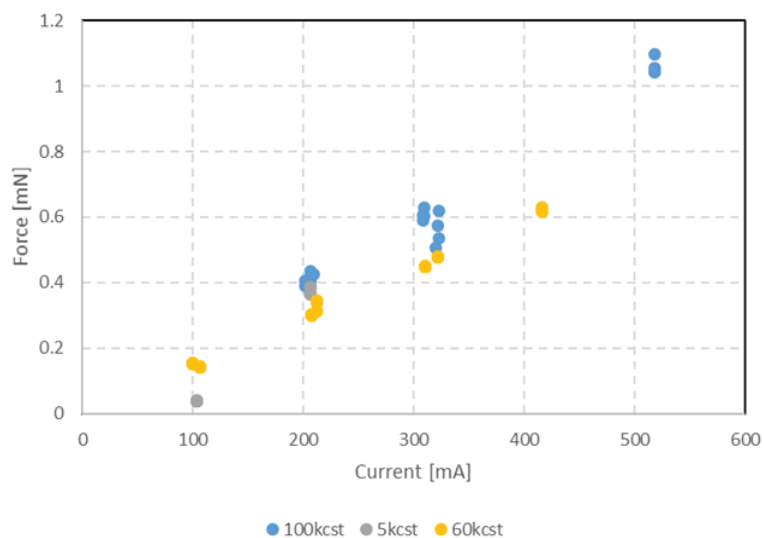

Figure S3. The master curve of force as a function of current for three silicone oils.
